# Supplementary material
Source: Elsevier journal article supplement (https://www.sciencedirect.com/science/article/pii/S0300893213001966)
Supplement: mmc1 [file mmc1.pdf]

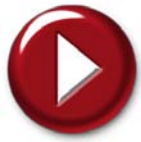

---

## **Cifras de colesterol adecuadas en pacientes coronarios y diabéticos. Análisis según especialidades médicas y Comunidades Autónomas**

Leopoldo Pérez de Isla<sup>a,\*</sup>, Adriana Saltijeral Cerezo<sup>b</sup>, Gustavo Vitale<sup>c</sup>, Belén González Timón<sup>c</sup>, Ana Torres Do Rego<sup>d</sup> y Luis Antonio Alvarez-Sala Walther<sup>d</sup>

*<sup>a</sup>Servicio de Cardiología, Hospital Clínico San Carlos, Madrid, España*

*<sup>b</sup>Servicio de Cardiología, Hospital del Tajo, Aranjuez, Madrid, España*

*<sup>c</sup>Departamento Médico, Merck Sharp and Dohme, MSD España*

*<sup>d</sup>Unidad de Riesgo Cardiovascular y Lípidos, Hospital General Universitario Gregorio Marañón, Facultad de Medicina, Universidad Complutense Madrid, Madrid, España*

---

# Control de cLDL por CCAA en pacientes coronarios

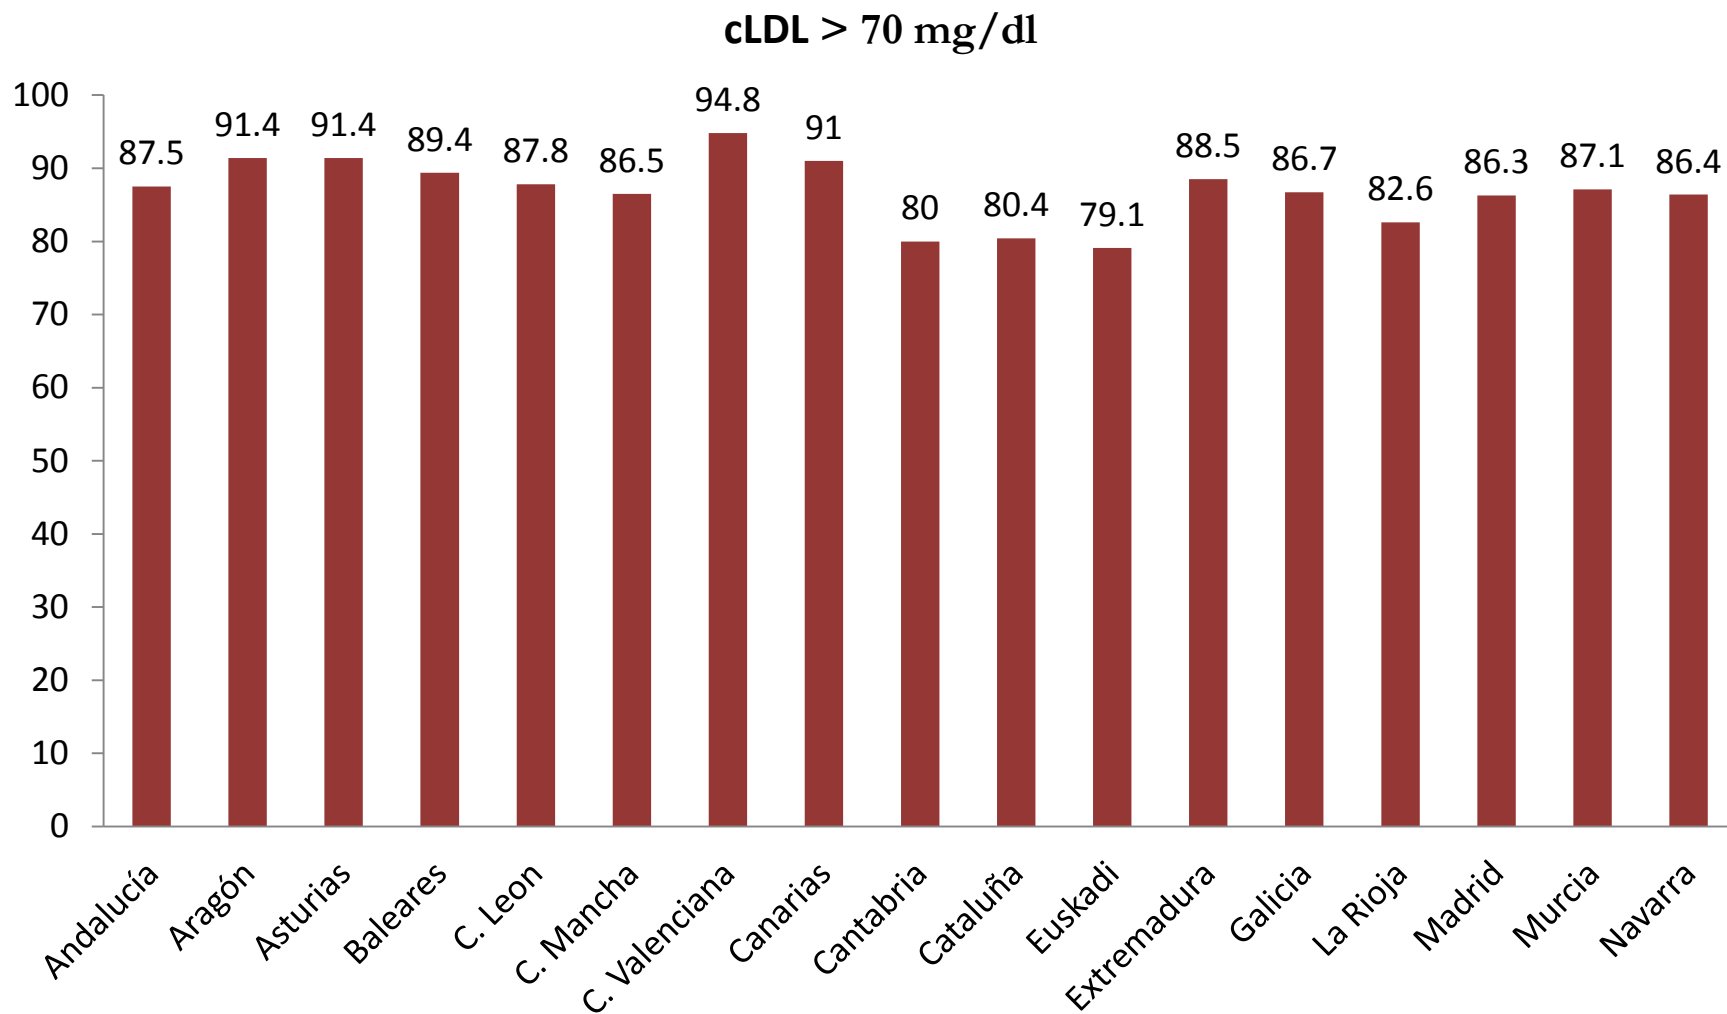

# Control de cLDL por CCAA en pacientes diabéticos

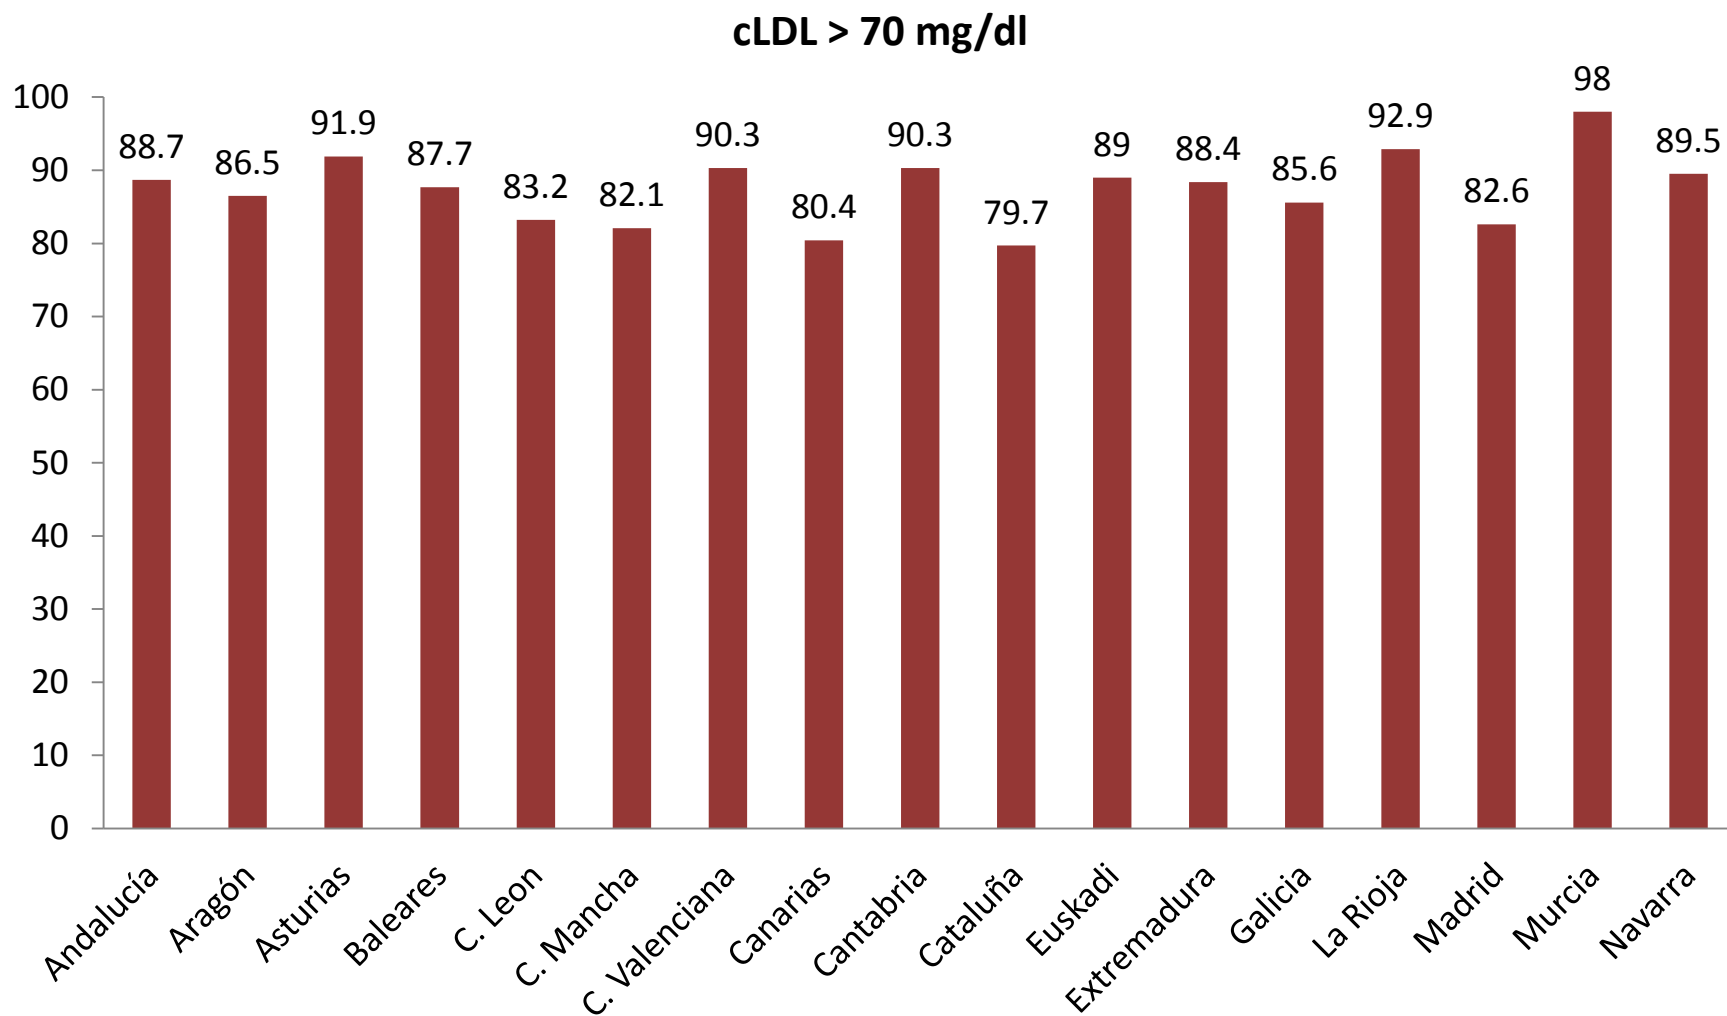

# Control de cLDL por CCAA en pacientes coronarios y diabéticos

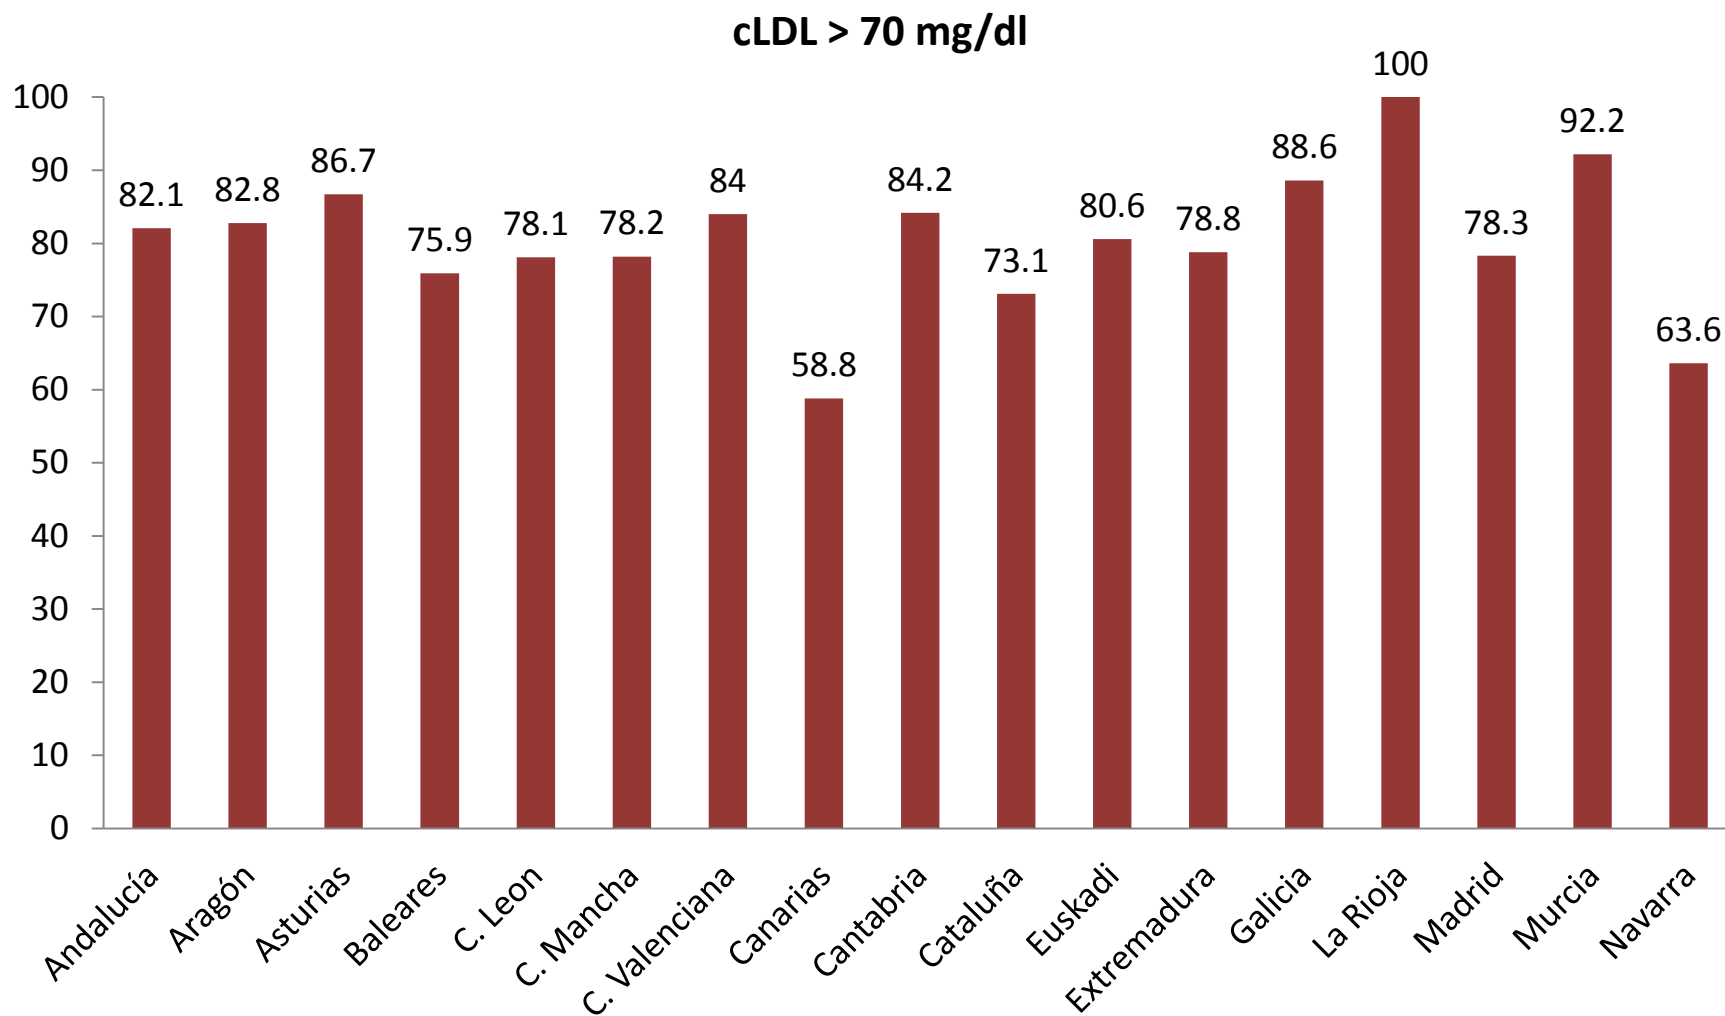

# Porcentaje de pacientes tratados con estatinas

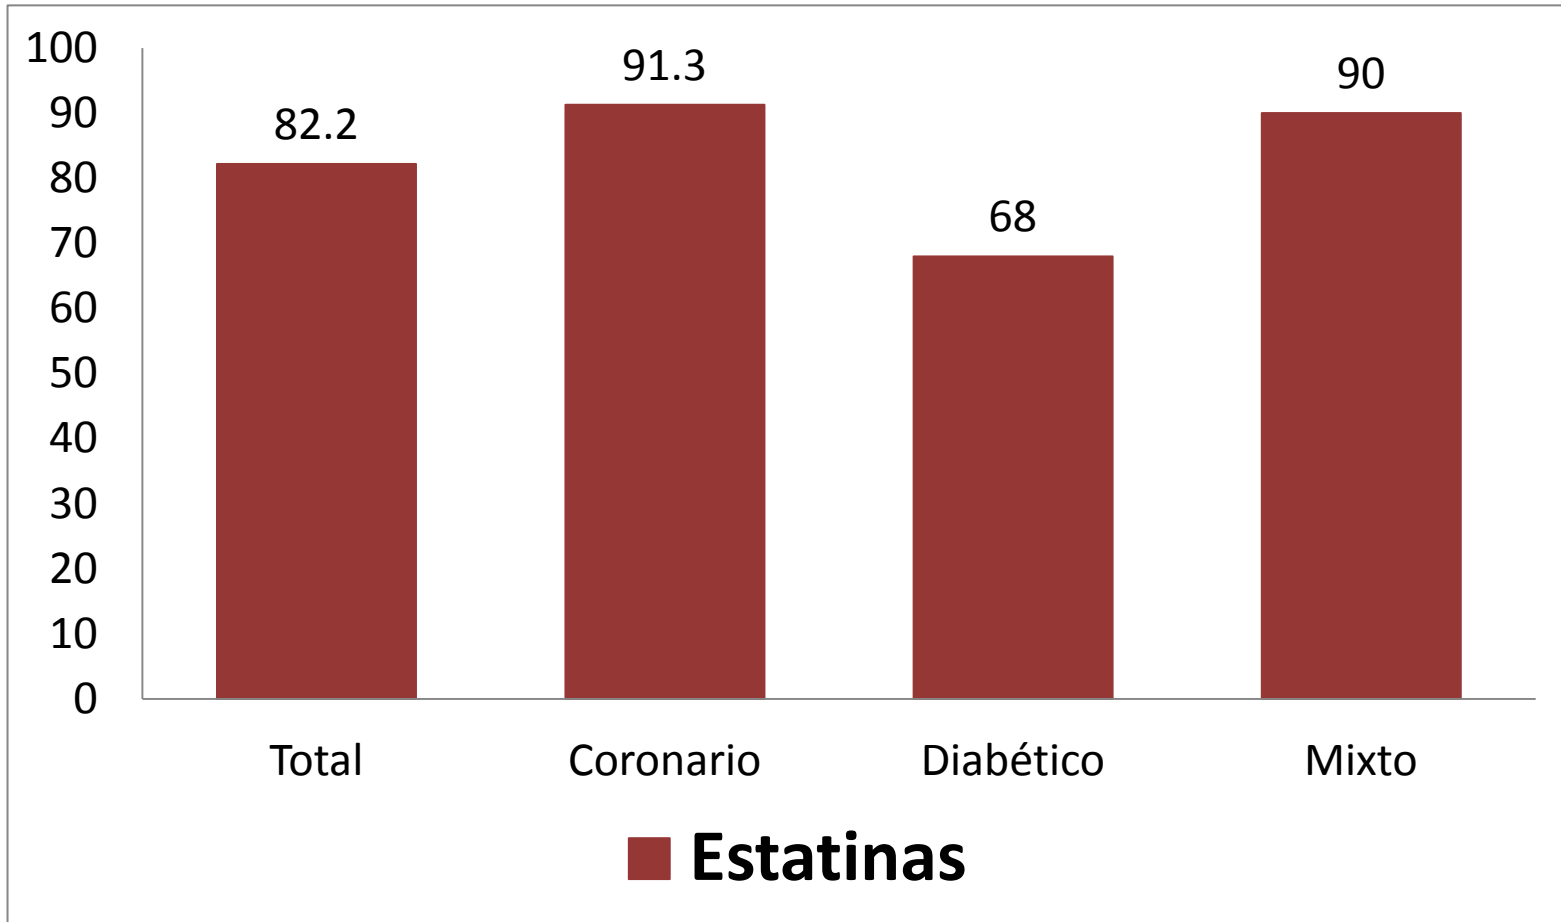

## Porcentaje de pacientes tratados con estatinas, dependiendo de la especialidad

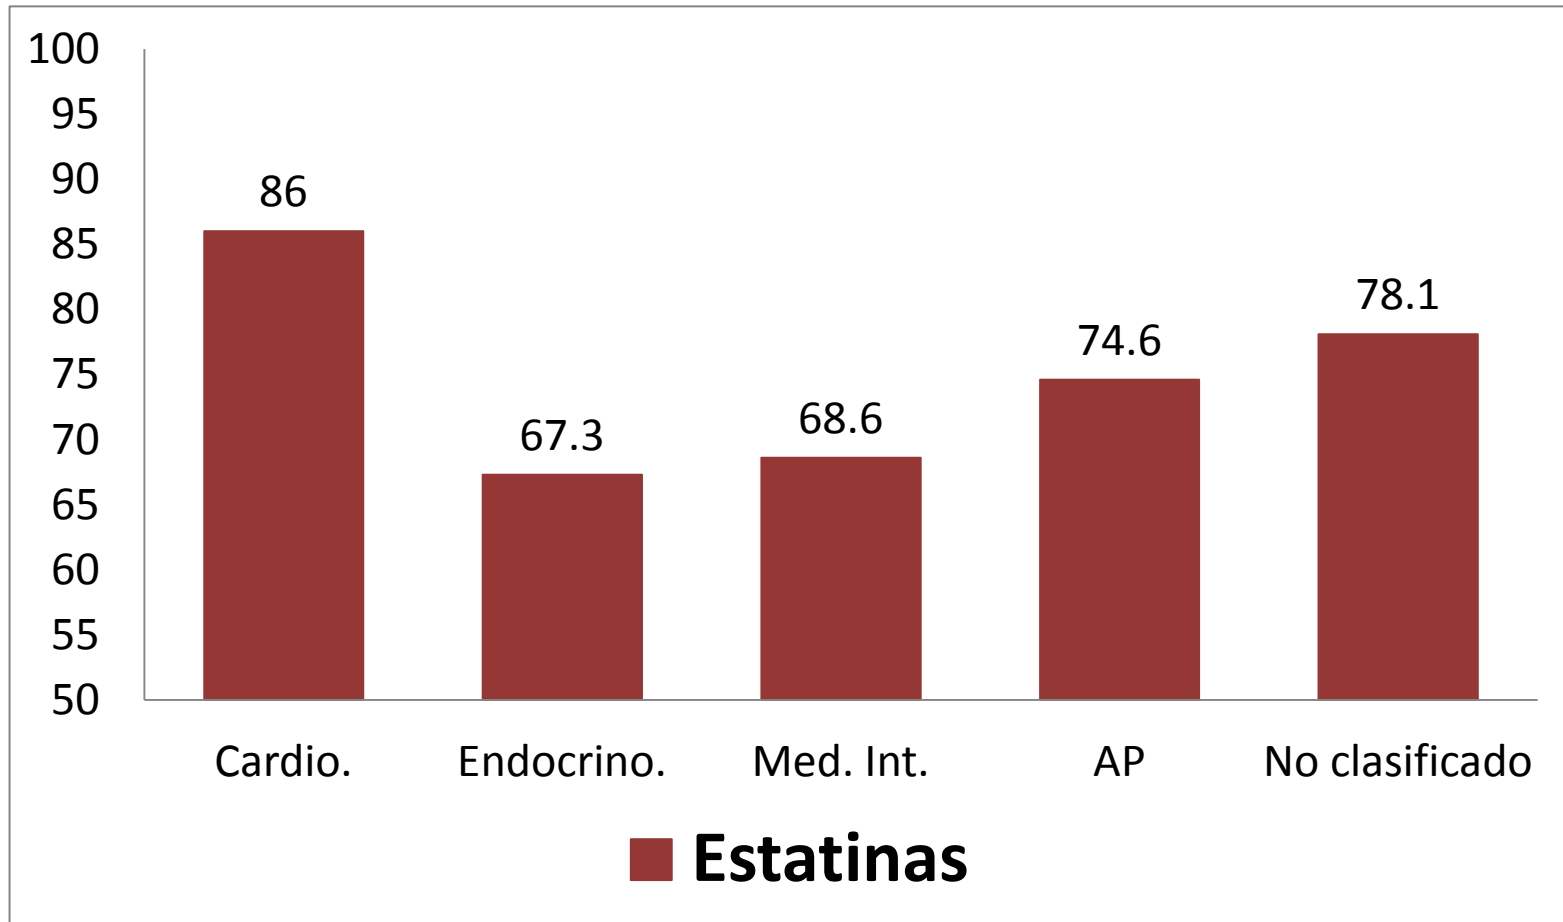

# Porcentaje de pacientes tratados con estatinas y ezetimiba

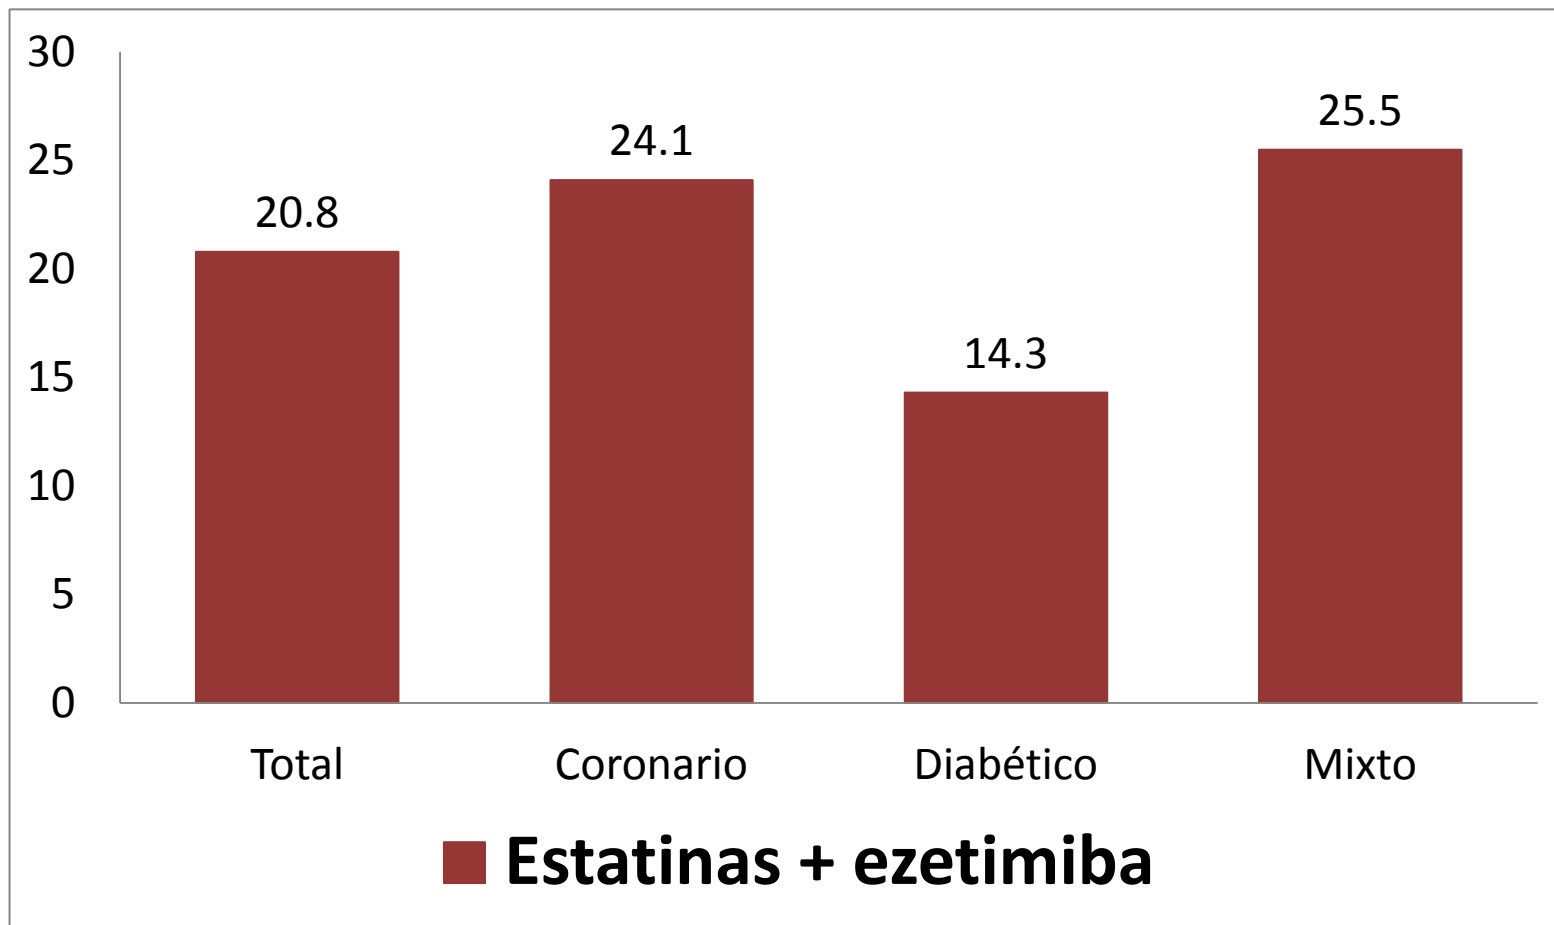

## Porcentaje de pacientes tratados con estatinas y ezetimiba dependiendo de la especialidad

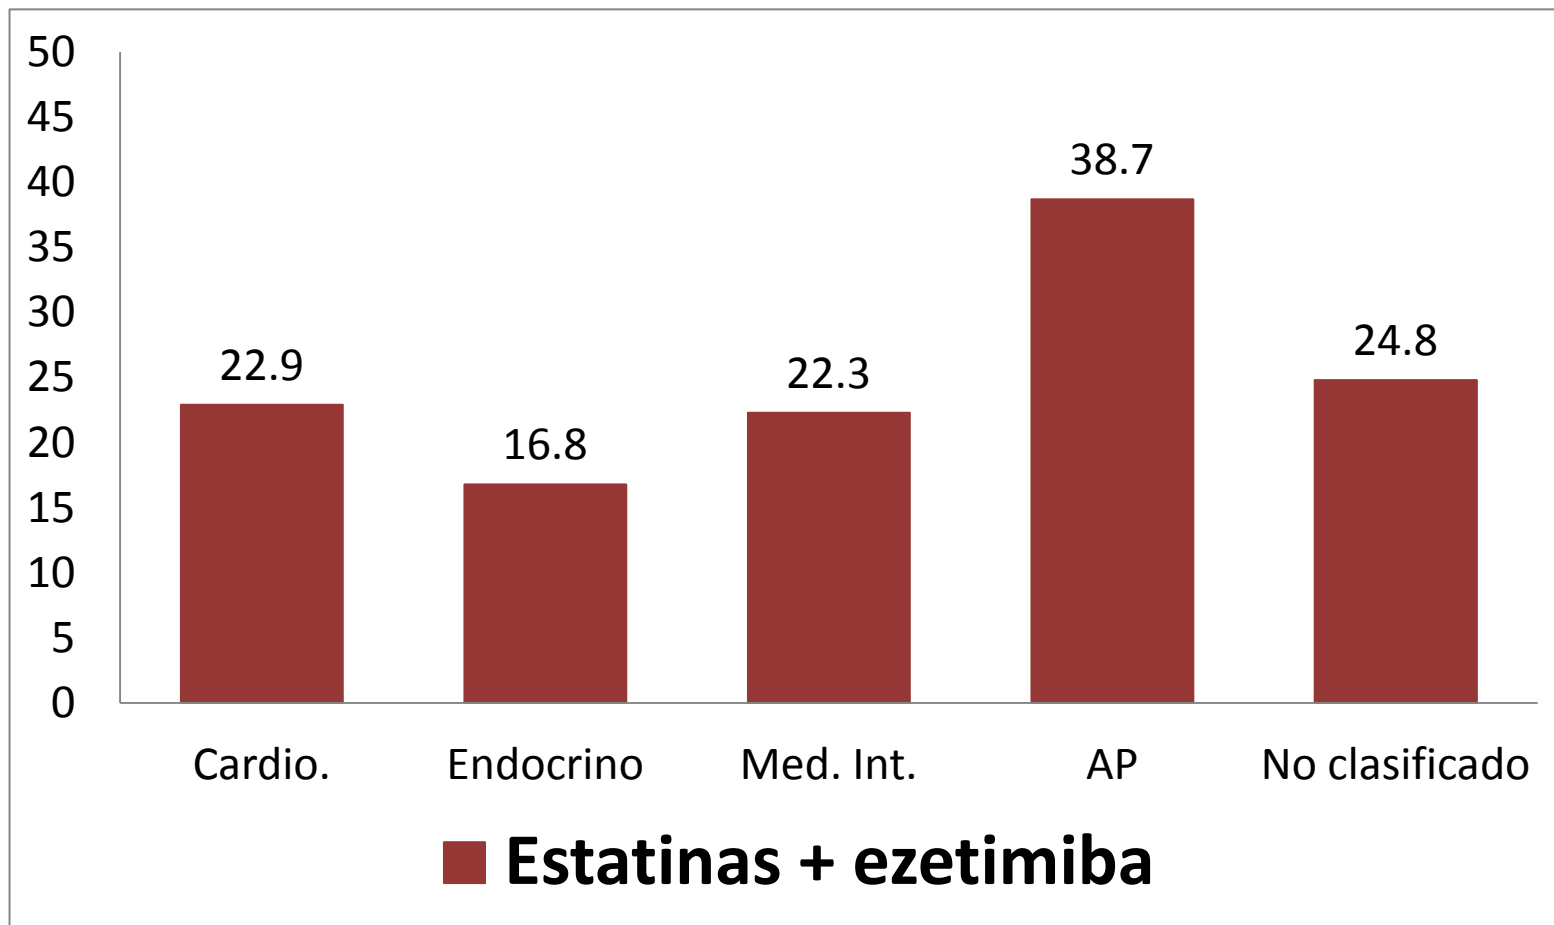

# Porcentaje de pacientes tratados con estatinas dependiendo de la Comunidad Autónoma

% pacientes con estatinas

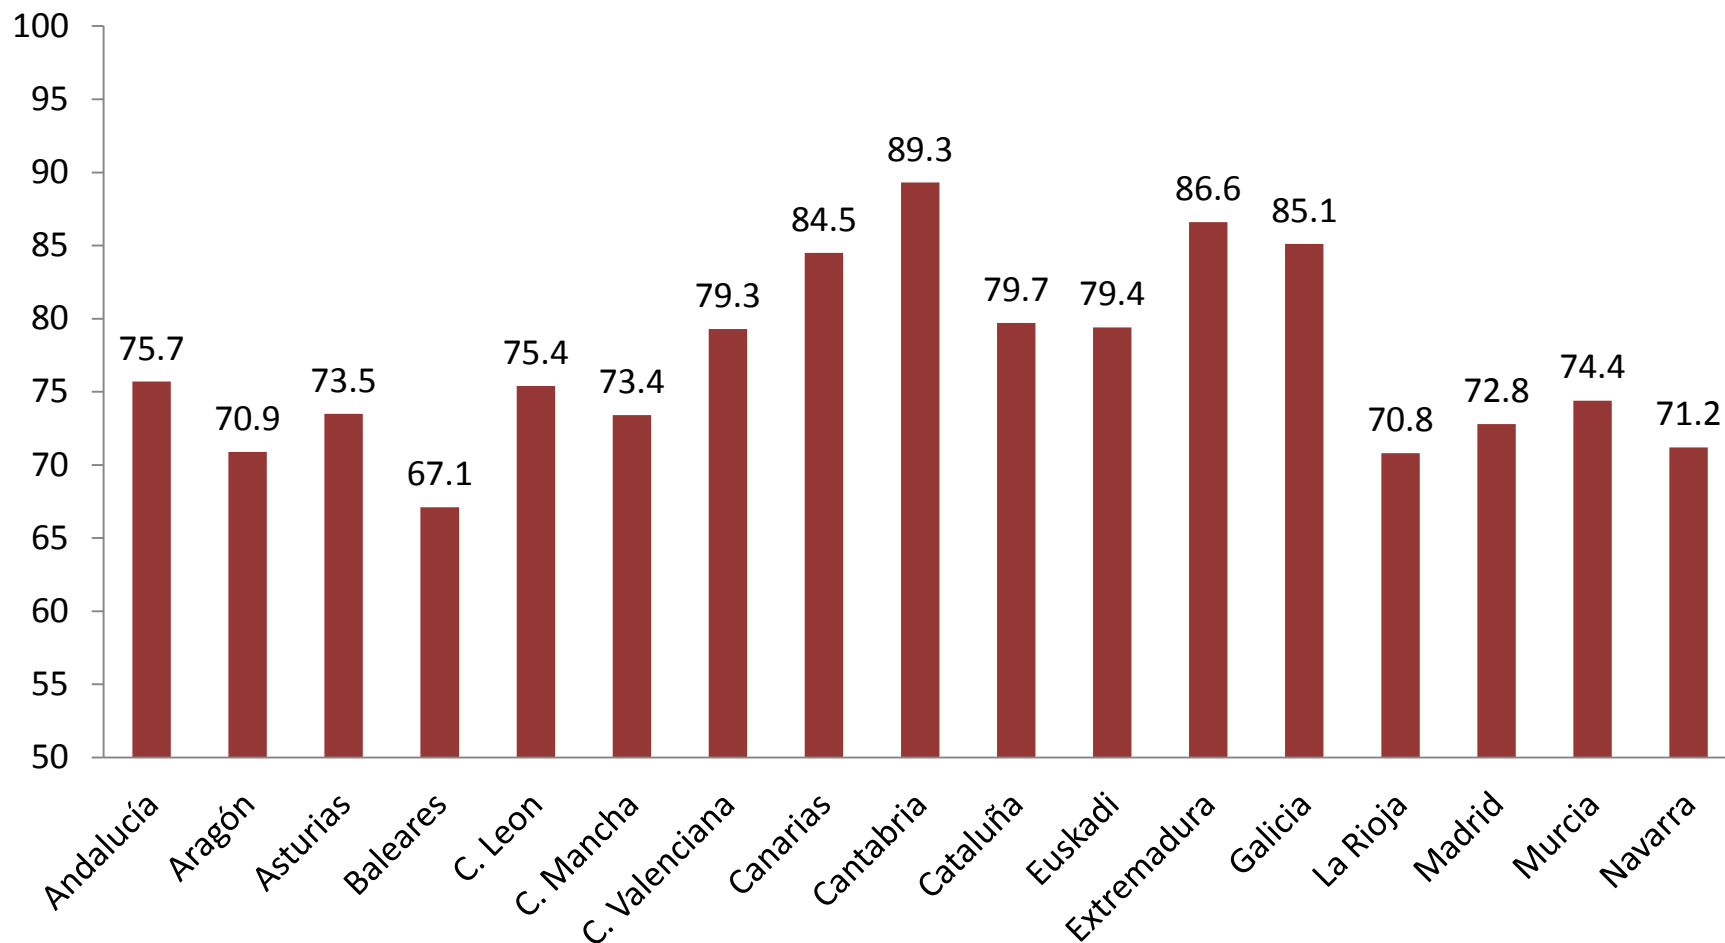

# Porcentaje de pacientes tratados con estatinas y ezetimibe dependiendo de la Comunidad Autónoma

% pacientes con estatinas + ezetimibe

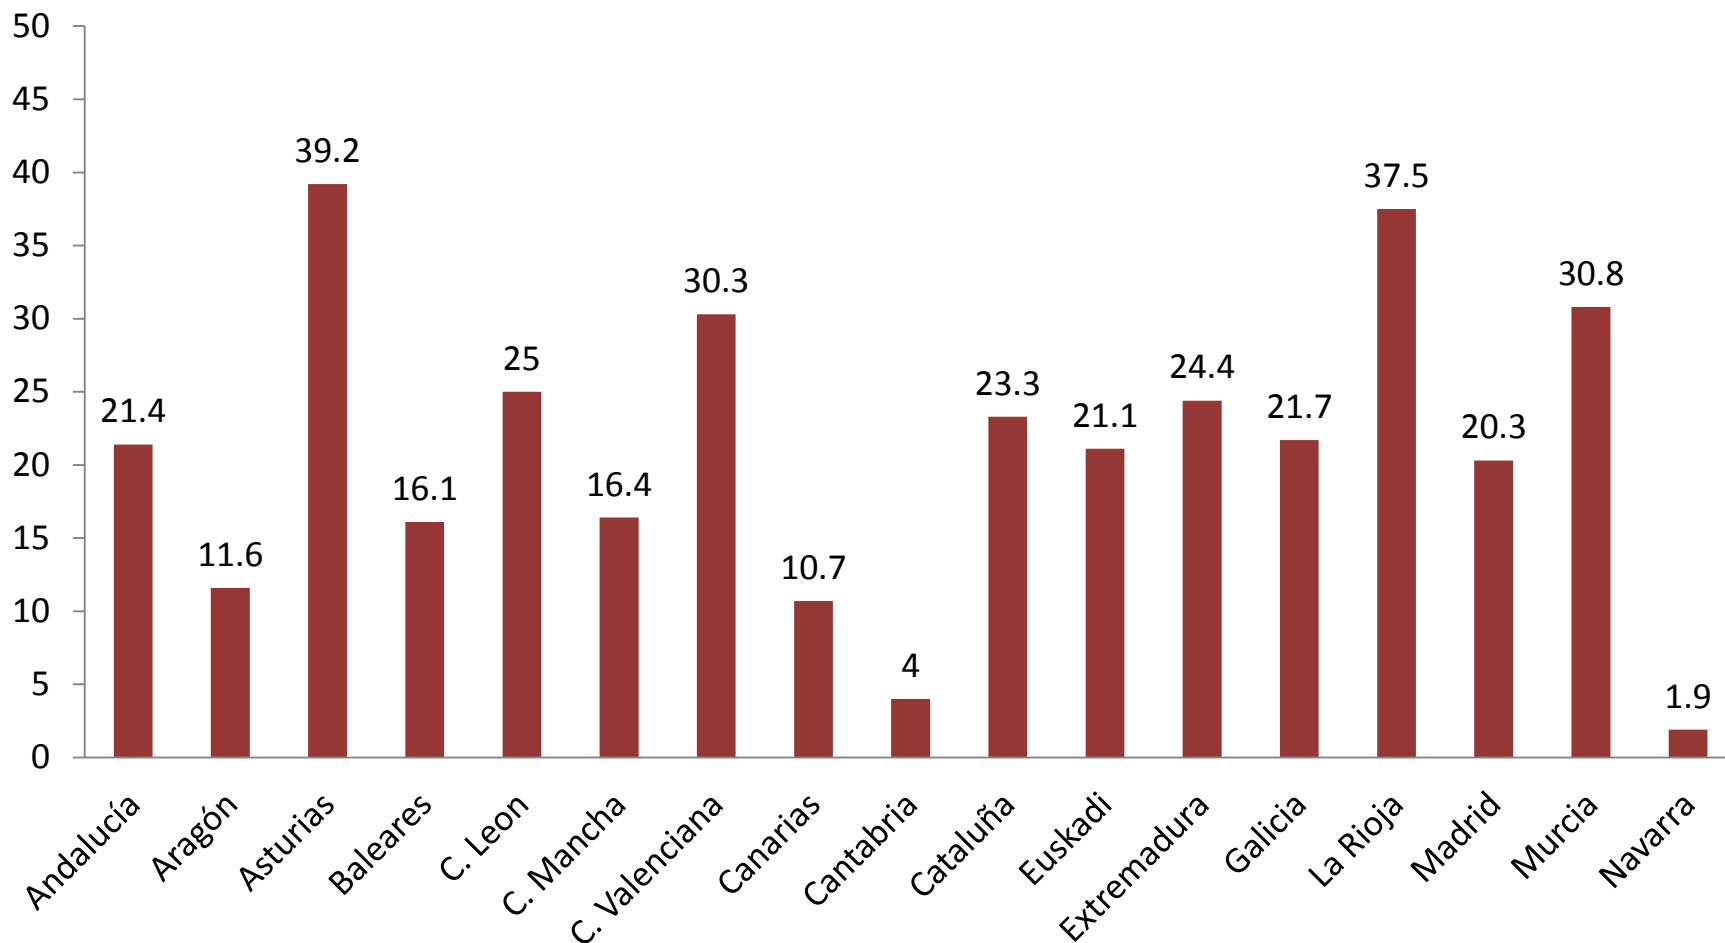

## **Dosis media estatina por especialidades (mg/día, independientemente de tipo de estatina)**

|                  | <b>Media</b> | <b>IC 95%</b> |
|------------------|--------------|---------------|
| Cardiología      | 37,24        | 35,17 - 39,31 |
| Endocrinología   | 51,18        | 43,56 - 58,80 |
| Medicina Interna | 48,85        | 41,89 - 55,81 |
| AP               | 35,69        | 25,72 - 45,65 |
| No clasificado   | 37,12        | 27,91 - 46,80 |

# Dosis media estatina por Comunidad Autónoma (mg/día, independientemente de tipo de estatina)

|                      | Media | IC 95%        |
|----------------------|-------|---------------|
| Andalucía            | 47,72 | 38,27 - 51,19 |
| Aragón               | 35,98 | 18,51 - 53,44 |
| Asturias             | 56,71 | 24,88 - 88,53 |
| Baleares             | 49,72 | 30,51 - 68,92 |
| Castilla y León      | 34,68 | 28,91 - 40,46 |
| Castilla-La Mancha   | 59,51 | 41,38 - 77,65 |
| Comunidad Valenciana | 49,94 | 41,86 - 58,02 |
| Canarias             | 31,28 | 25,87 - 36,68 |
| Cantabria            | 28,48 | 24,02 - 32,95 |
| Cataluña             | 40,01 | 35,14 - 44,88 |
| Eus                  | 41,42 | 31,49 - 51,36 |
| Extremadura          | 41,62 | 36,88 - 46,35 |
| Galicia              | 33,46 | 31,06 - 35,86 |
| La Rioja             | 47,94 | 13,42 - 82,46 |
| Comunidad de Madrid  | 41,82 | 34,61 - 49,04 |
| Murcia               | 35,30 | 28,61 - 41,99 |
| Navarra              | 35,53 | 25,72 - 45,33 |
